# Supplementary material for: Are MTHFR C677T and MTRR A66G Polymorphisms Associated with Overweight/Obesity Risk? From a Case-Control to a Meta-Analysis of 30,327 Subjects
Source: MDPI journal article supplement (doi:10.3390/ijms160611849), 2015-05-26
Supplement: s1 [file s1]

## Supplementary Information

**Table S1.** Baseline characteristics of the studies included in the meta-analysis.

| Author (Year) [Ref.]                        | Country (Ethnicity)  | Genotyping Method | Mean Age (Cases/Controls)          | Source of Controls | Diagnose Criteria                             | BMI (Cases; Controls)                         | SNPs Studied                            |
|---------------------------------------------|----------------------|-------------------|------------------------------------|--------------------|-----------------------------------------------|-----------------------------------------------|-----------------------------------------|
| Thawnashom <i>et al.</i> (2005) [4]         | Thailand (Asian)     | PCR-RFLP          | 40/38                              | HB                 | BMI $\geq$ 25                                 | 31.5 (25.1–56.2);<br>21.8 (18.52–24.97) *     | <i>MTHFR</i> C677T                      |
| Terruzzi <i>et al.</i> (2007) [5]           | Italy (Caucasian)    | PCR-RFLP          | 43.3/35.2                          | HB                 | BMI $\geq$ 30                                 | 34.1 $\pm$ 7.1;<br>22.4 $\pm$ 1.8 #           | <i>MTHFR</i> C677T;<br><i>MTRR</i> A66G |
| Lewis <i>et al.</i> (2008) [6] <sup>a</sup> | English (Caucasian)  | TaqMan            | 68.8 <sup>e</sup>                  | PB                 | BMI $\geq$ 30                                 | None                                          | <i>MTHFR</i> C677T                      |
| Lewis <i>et al.</i> (2008) [6] <sup>b</sup> | English (Caucasian)  | TaqMan            | 28.5 <sup>e</sup><br>(Young women) | PB                 | BMI $\geq$ 30                                 | None                                          | <i>MTHFR</i> C677T                      |
| Lewis <i>et al.</i> (2008) [6] <sup>c</sup> | English (Caucasian)  | TaqMan            | 9.9 <sup>e</sup><br>(Children)     | PB                 | Females:<br>BMI > 23.46<br>Males: BMI > 23.39 | None                                          | <i>MTHFR</i> C677T                      |
| Lewis <i>et al.</i> (2008) [6] <sup>d</sup> | Danish (Caucasian)   | PCR-RFLP          | 57.6 <sup>e</sup>                  | PB                 | BMI $\geq$ 30                                 | None                                          | <i>MTHFR</i> C677T                      |
| Settin <i>et al.</i> (2009) [7]             | Saudi Arabia (Asian) | TaqMan            | 27/24                              | HB                 | BMI $\geq$ 25                                 | 27 $\pm$ 9.8;<br>24 $\pm$ 8.8 #               | <i>MTHFR</i> C677T                      |
| Bazzaz <i>et al.</i> (2010) [8]             | Iran (Asian)         | PCR-RFLP          | 44.8/41.6                          | HB                 | BMI $\geq$ 30                                 | 33.8 $\pm$ 3.4;<br>24.8 $\pm$ 2.9 #           | <i>MTHFR</i> C677T                      |
| Gara <i>et al.</i> (2011) [9]               | Tunisia (African)    | Pyrosequencing    | 4.6–14.3/NA                        | HB                 | BMI > 97% percentile                          | None                                          | <i>MTHFR</i> C677T                      |
| Chauhan <i>et al.</i> (2012) [10]           | India (Asian)        | GoldenGate assay  | 44–64 <sup>e</sup>                 | PB                 | BMI $\geq$ 23                                 | None                                          | <i>MTHFR</i> C677T                      |
| Yin <i>et al.</i> (2012) [11]               | China (Asian)        | PCR-RFLP          | 41.25/41.48                        | PB                 | BMI $\geq$ 24                                 | 26.48 $\pm$ 2.59;<br>21.23 $\pm$ 1.68 #       | <i>MTHFR</i> C677T                      |
| Tabassum <i>et al.</i> (2012) [12]          | India (Asian)        | GoldenGate assay  | 13.00/14.00                        | PB                 | BMI $\geq$ 25                                 | 25.85 (23.97–28.97);<br>17.58 (15.86–19.44) * | <i>MTHFR</i> C677T,<br><i>MTRR</i> A66G |

Abbreviation: *MTHFR*, methylenetetrahydrofolate reductase; *MTRR*, methionine synthase reductase; PCR-RFLP, polymerase chain reaction-restriction fragment length polymorphism; HB, hospital based; PB, population based; BMI, body mass index; NA, not available; <sup>a</sup> BWHHS cohort study; <sup>b</sup> ALSPAC women cohort study; <sup>c</sup> ALSPAC children cohort study; <sup>d</sup> CCHS cohort study; <sup>e</sup> The mean age of all subjects; \* Data are presented as the median (25th–75th); # Data are presented as the mean  $\pm$  SD.

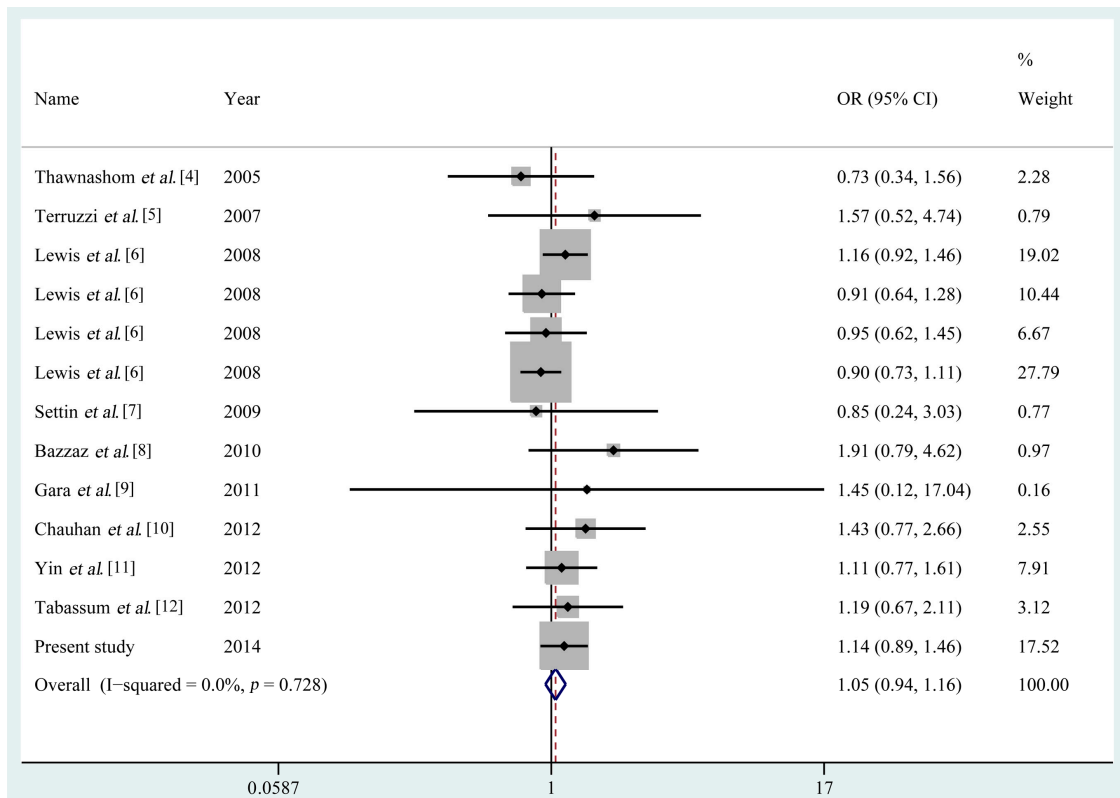

**Figure S1.** Forest plot of the association between the *MTHFR* C677T polymorphism and being overweight/obesity in the recessive model (TT vs. CT + CC).

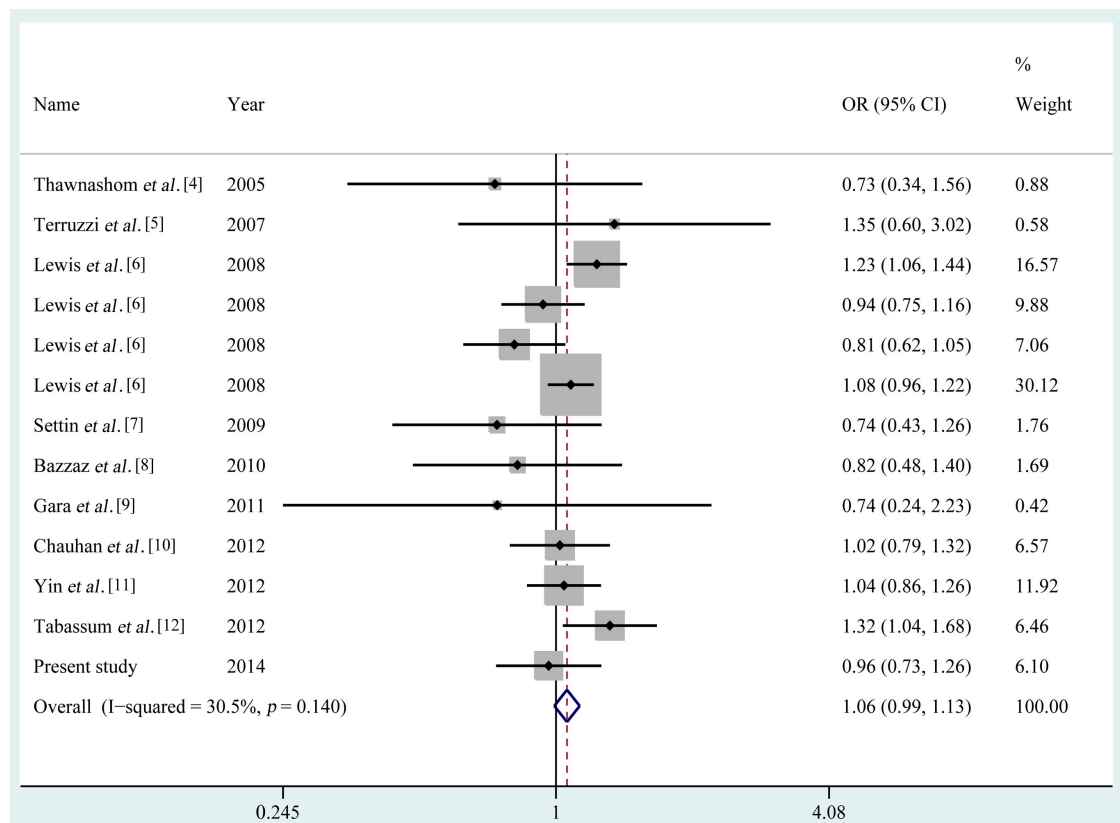

**Figure S2.** Forest plot of the association between the *MTHFR* C677T polymorphism and being overweight/obesity in the dominant model (TT + CT vs. CC).

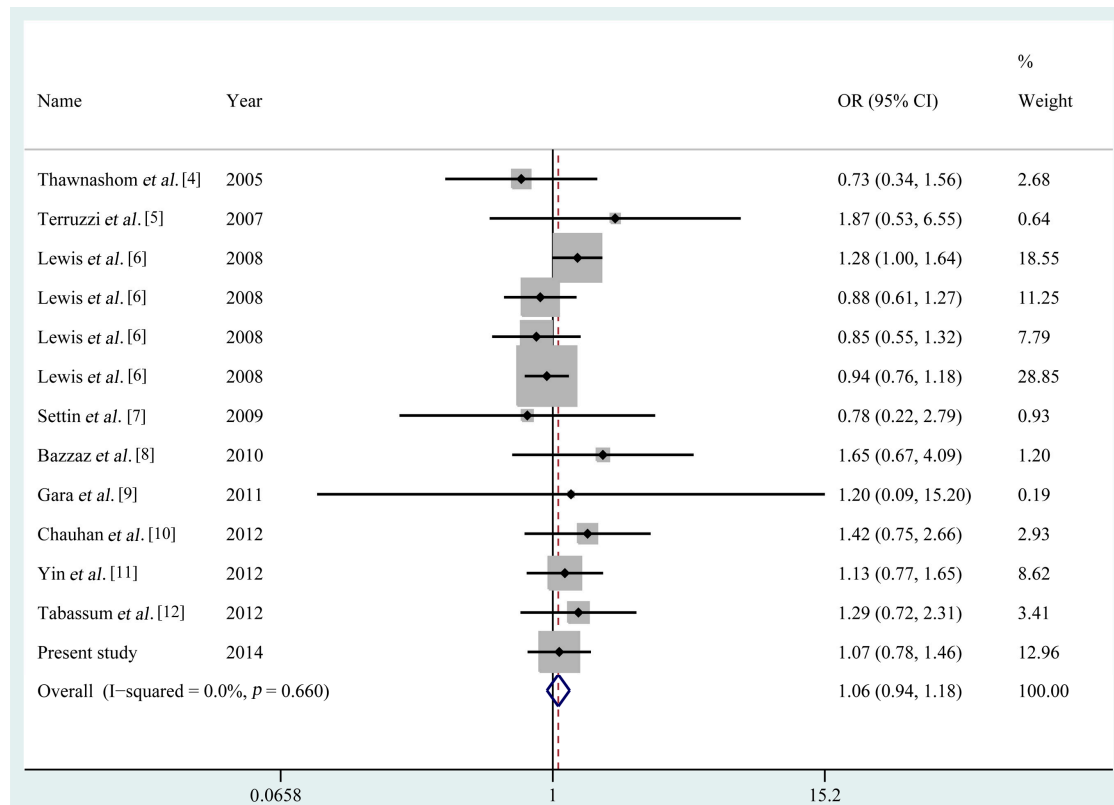

**Figure S3.** Forest plot of the association between the *MTHFR* C677T polymorphism and being overweight/obesity in the homozygous codominant model (TT vs. CC).

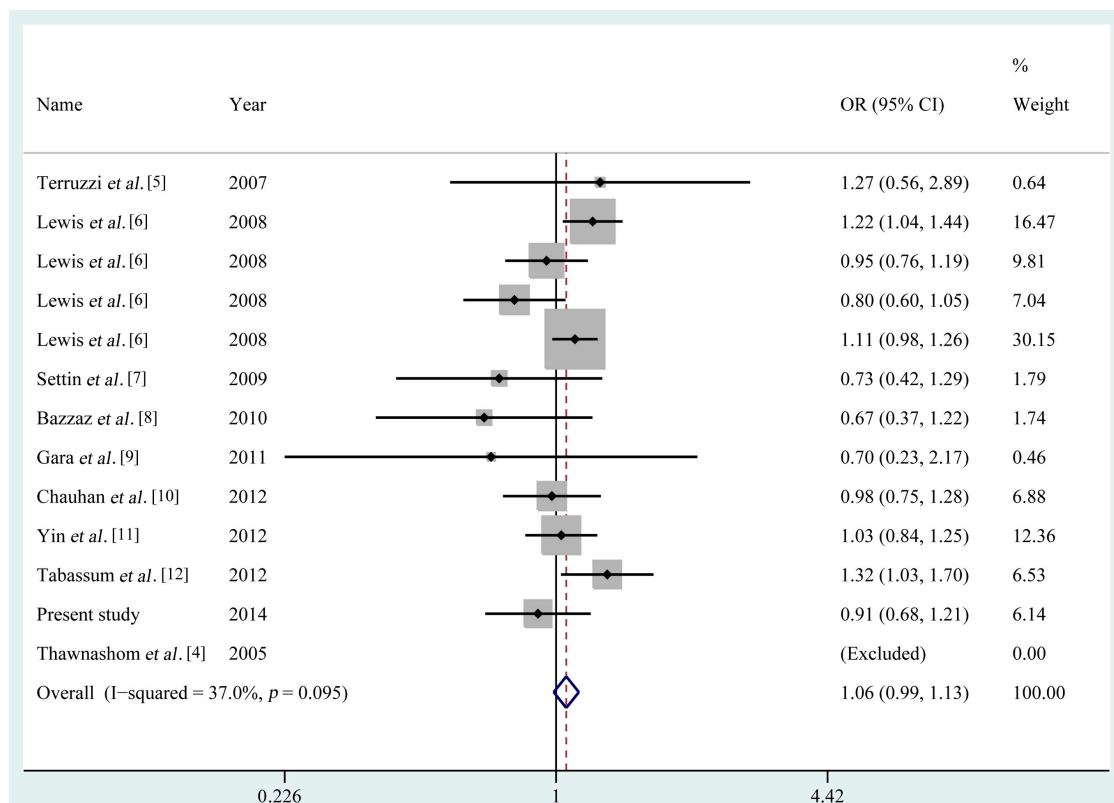

**Figure S4.** Forest plot of the association between the *MTHFR* C677T polymorphism and being overweight/obesity in the heterozygous codominant model (CT vs. CC).

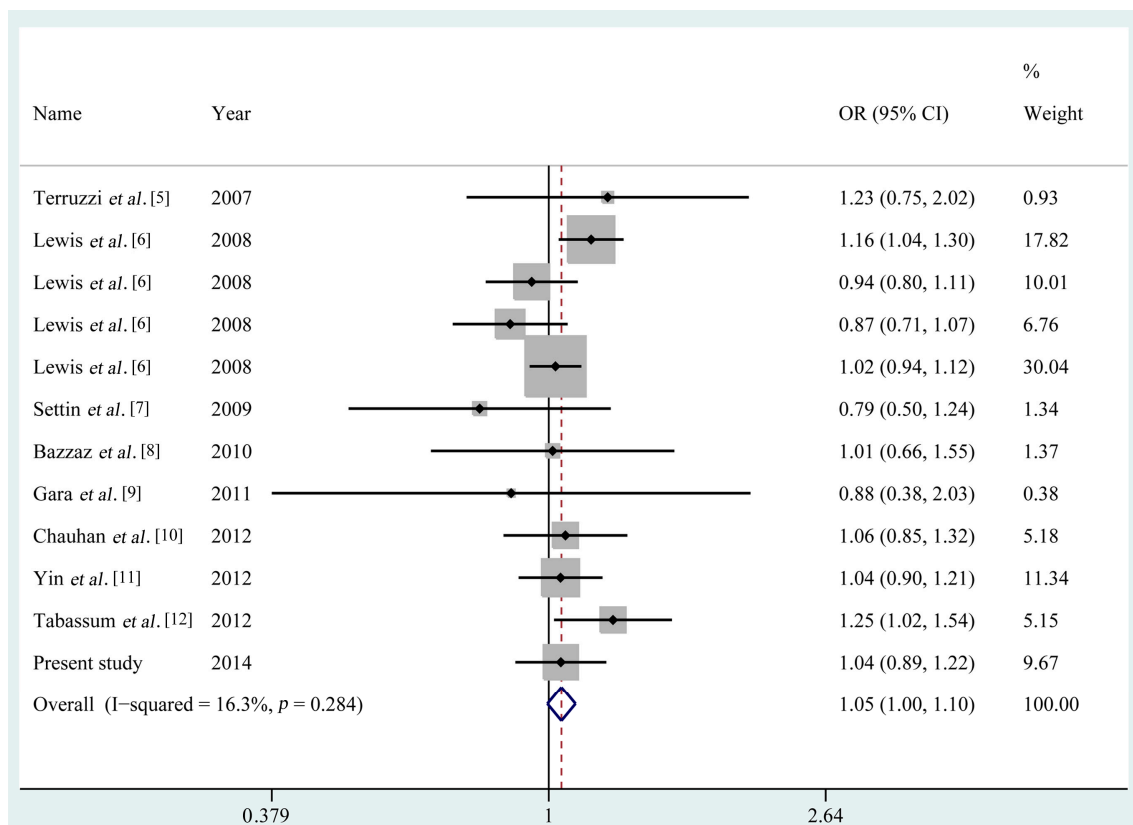

**Figure S5.** Forest plot of the association between the *MTHFR* C677T polymorphism and being overweight/obesity in the allelic model (T vs. C).

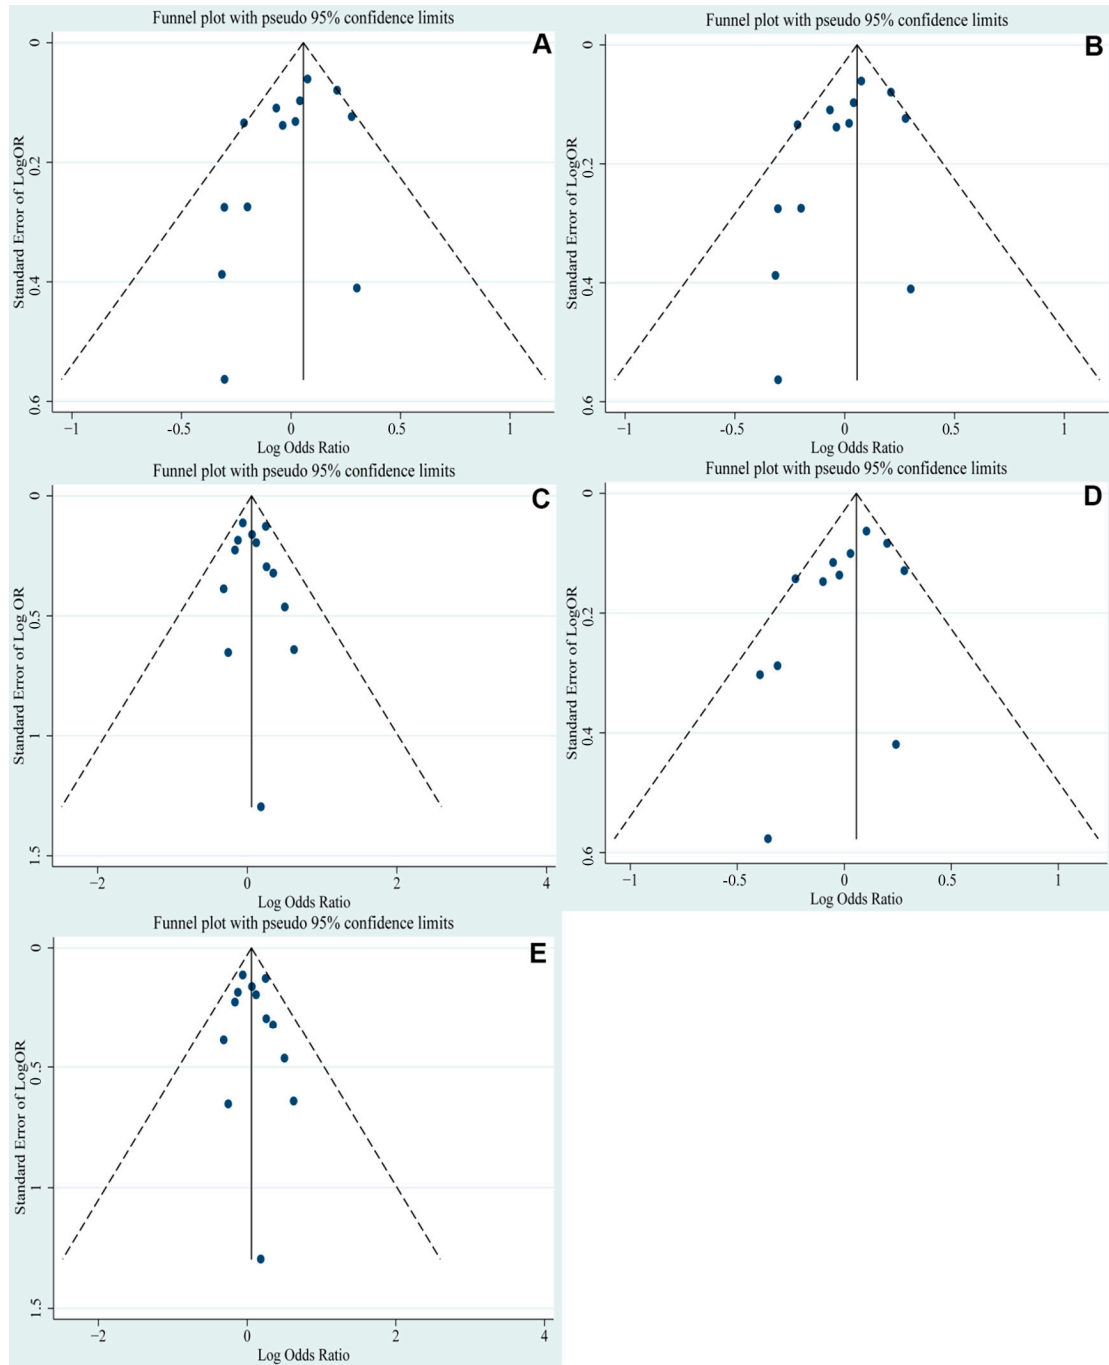

**Figure S6.** Funnel plot analysis on the detection of publication bias in the meta-analysis of the associations between MTHFR polymorphisms and being overweight/obesity: (A) recessive model; (B) dominant model; (C) homozygous codominant model; (D) heterozygous codominant model; (E) allelic model.

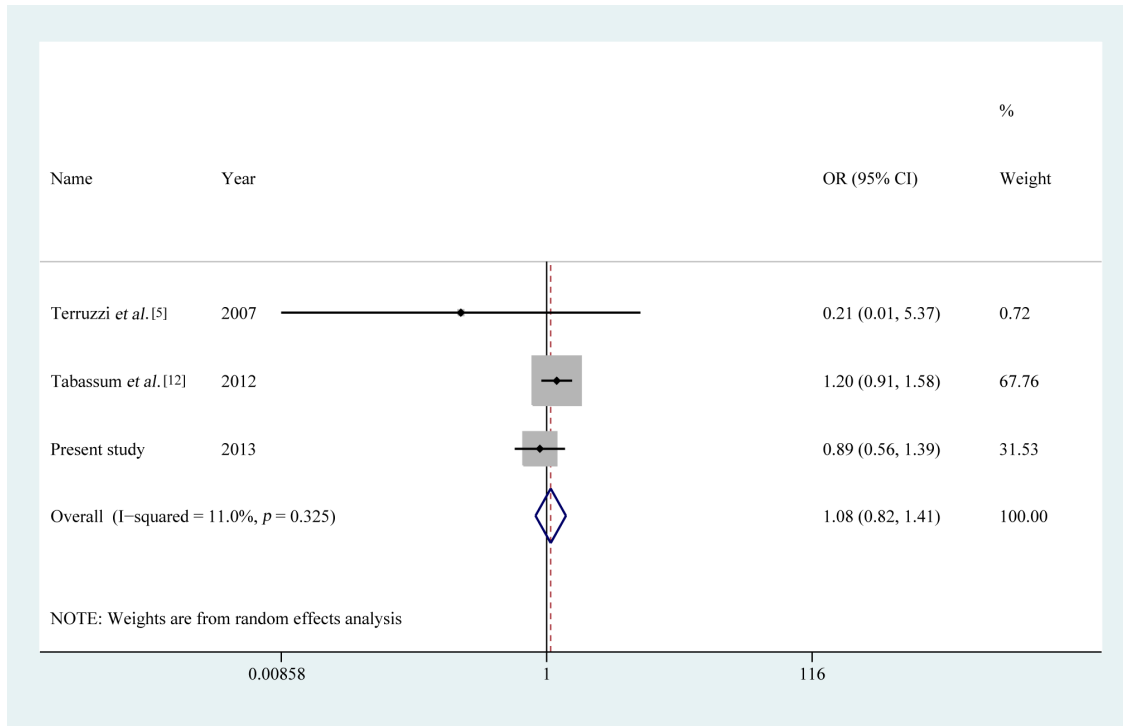

**Figure S7.** Forest plot of the association between the *MTRR* A66G polymorphism and being overweight/obesity in the recessive model (TT vs. CT + CC).

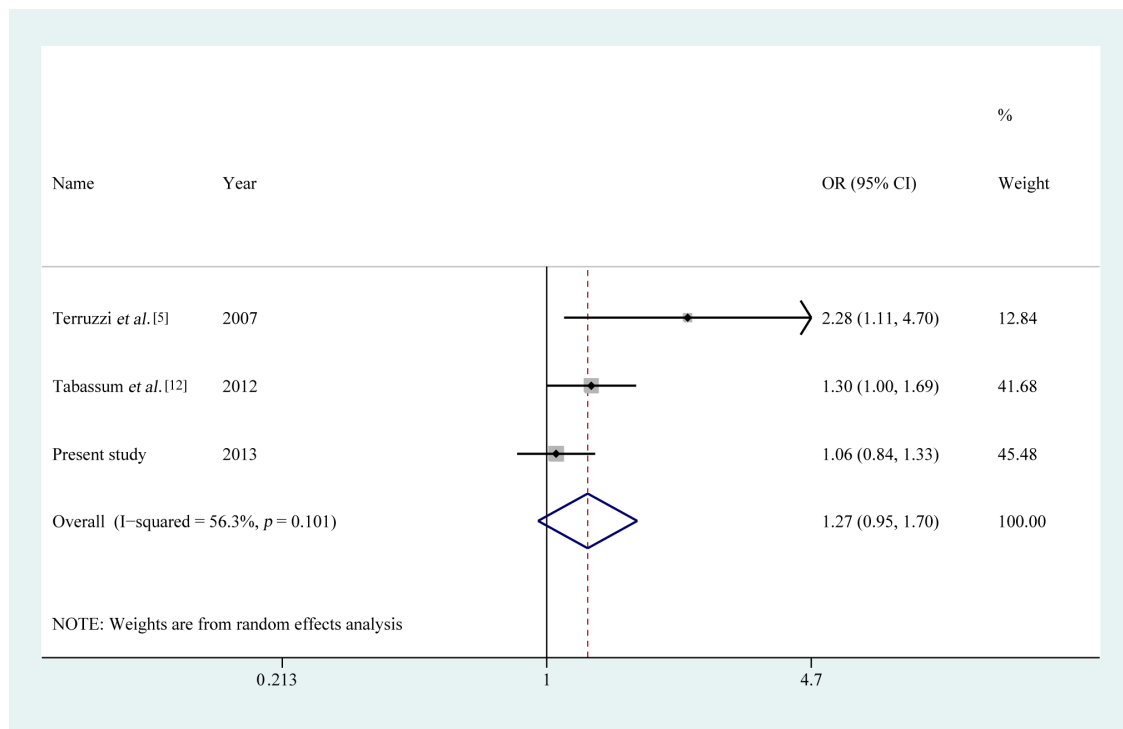

**Figure S8.** Forest plot of the association between the *MTRR* A66G polymorphism and being overweight/obesity in the dominant model (TT + CT vs. CC).

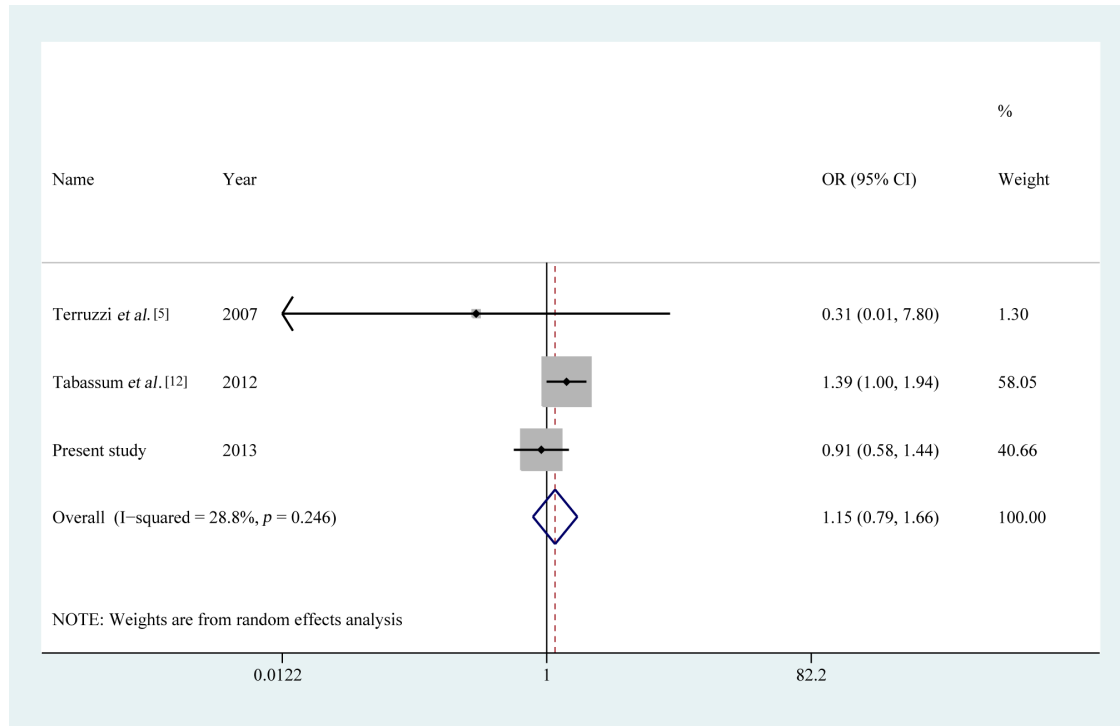

**Figure S9.** Forest plot of the association between the *MTRR* A66G polymorphism and being overweight/obesity in the homozygous codominant model (TT vs. CC).

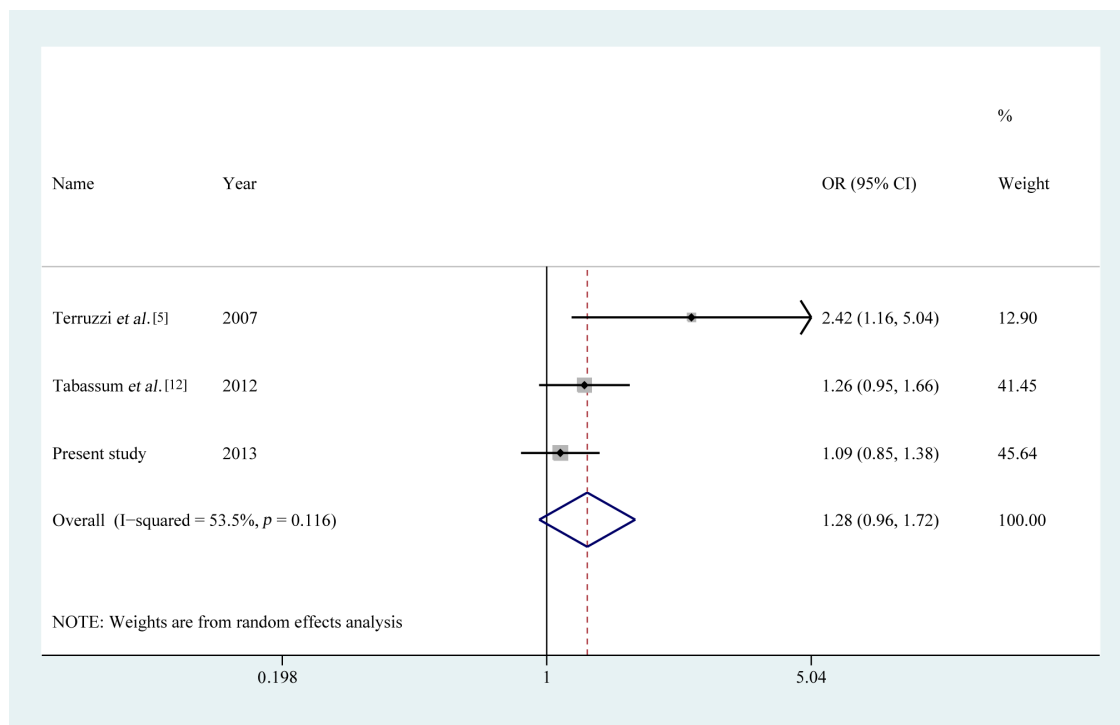

**Figure S10.** Forest plot of the association between the *MTRR* A66G polymorphism and being overweight/obesity in the heterozygous codominant model (CT vs. CC).

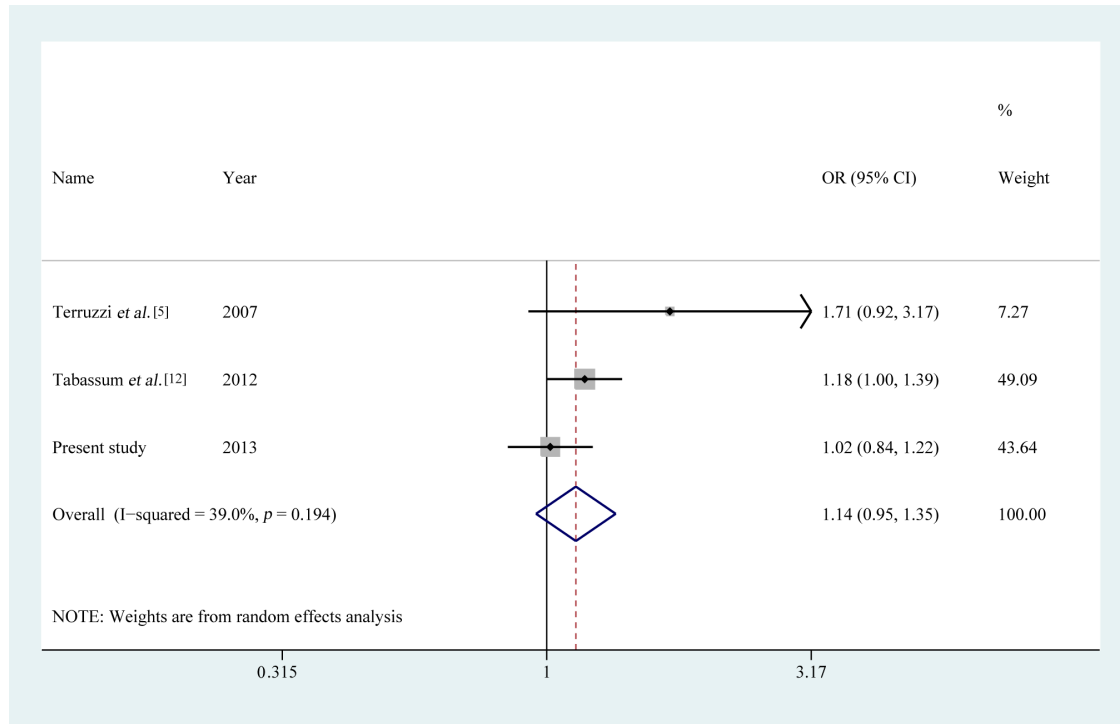

**Figure S11.** Forest plot of the association between the *MTRR* A66G polymorphism and being overweight/obesity in the allelic model (T vs. C).
